# Supplementary material
Source: publisher figshare collection journal article supplement (https://brill.figshare.com/articles/dataset/_/3750258)
Supplement: Supplementary file 1 [file 1]

## Genetic evidence for multiple paternity in the critically endangered Cuban crocodile (*Crocodylus rhombifer*)

Yoamel Milián-García<sup>1,2,3,\*</sup>, Evelyn Jensen<sup>2</sup>, Sheila Ribalta Mena<sup>1</sup>, Etiam Pérez Fleitas<sup>4</sup>, Gustavo Sosa Rodríguez<sup>4</sup>, Leiter Guerra Manchena<sup>4</sup>, Georgina Espinosa López<sup>1</sup>, Michael Russello<sup>2,\*</sup>

<sup>1</sup>Facultad de Biología, Universidad de La Habana, calle 25 # 455, e/ J e I, Plaza Vedado, 10400 La Habana, Cuba

<sup>2</sup>Department of Biology, University of British Columbia, Okanagan Campus, 3333 University Way, Kelowna, V1V 1V7, British Columbia, Canada

<sup>3</sup>Centro de Investigaciones Marinas, Universidad de La Habana, calle 16 #114, e/ 1<sup>ra</sup> y 3<sup>ra</sup>, Miramar, Playa, 11300 La Habana, Cuba

<sup>4</sup>Empresa Nacional para la Protección de la Flora y la Fauna, calle 42 y 514 Esq.7 Ave, Miramar, La Habana, Cuba

### Supplementary Material

**Supplementary Movie 1 (as separate file).** Cuban crocodiles (*Crocodylus rhombifer*) mating in the breeding pen (C22) at the Zapata Swamp captive breeding facility. Video by YMG.

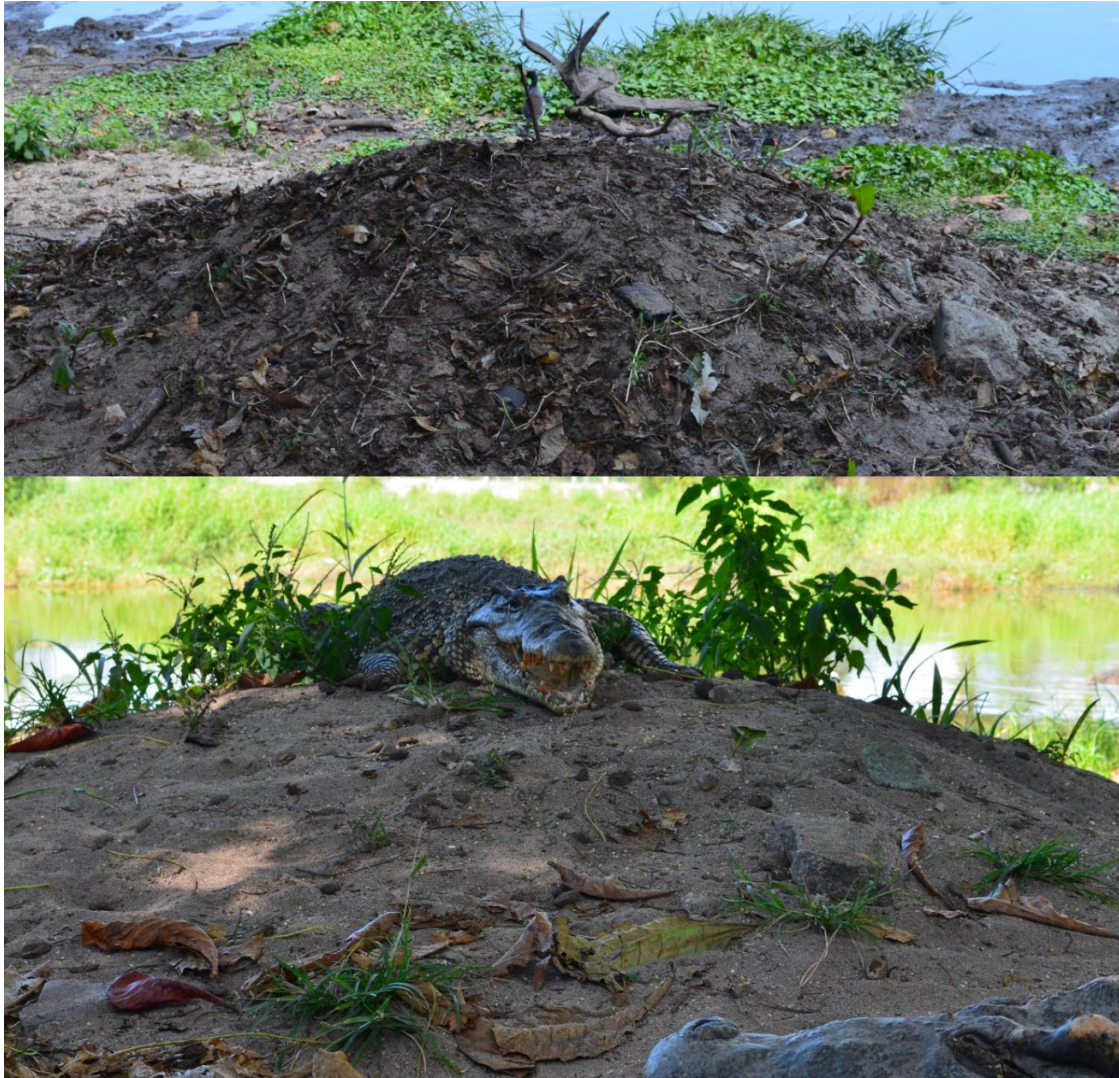

**Figure S1.** Mound nest built (upper) and guarded (lower) by a female Cuban crocodile in the breeding pen (C22) at the Zapata Swamp breeding facility. Images by YMG.

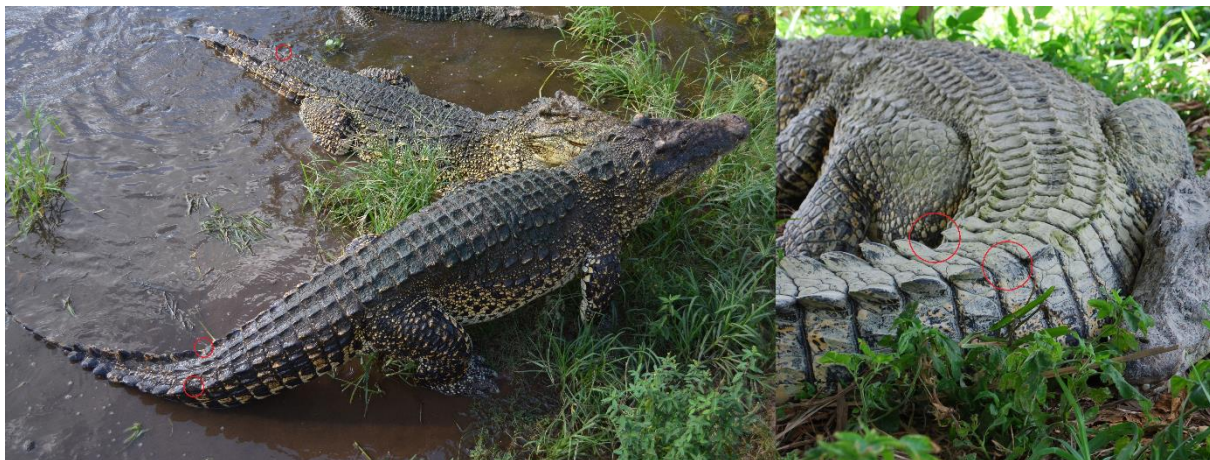

**Figure S2.** Tail marking scheme used at the Zapata Swamp captive breeding facility. Images by YM

**Table S1.** Genotypes for each individual within the best configuration from the sibship reconstructions in the five clutches, including the mother observed with guarding behavior for each nest. The discrepancies in the genotypes obtained between the hatchlings and the mother per locus are highlighted in grey.

| Group              | ID      | Cj16    | Cj18    | Cj20    | Cj35    | Cj109   | Cj119   | Cj127   | Cj131   | CU5-123 |
|--------------------|---------|---------|---------|---------|---------|---------|---------|---------|---------|---------|
| 1                  | N-6_199 | 163/163 | 224/234 | 174/176 | 166/166 | /       | 199/211 | 327/335 | 240/262 | 231/231 |
| 1                  | N-6_200 | 163/163 | 224/234 | 176/176 | 166/166 | /       | 211/221 | 335/335 | 258/262 | 231/231 |
| 2                  | N-6_202 | 159/163 | 224/234 | 174/174 | 166/184 | /       | 227/231 | 327/373 | 232/258 | 221/221 |
| 3                  | N-6_212 | 159/169 | 230/234 | 176/176 | 166/166 | /       | 199/225 | 327/335 | 240/258 | 221/221 |
| 4                  | N-6_198 | 163/193 | 230/234 | 174/176 | 166/166 | /       | 211/225 | 335/335 | 262/262 | 221/221 |
| 4                  | N-6_201 | 163/193 | 230/234 | 176/182 | 166/166 | /       | 199/225 | 327/335 | 248/262 | 221/231 |
| 4                  | N-6_203 | 163/163 | 230/234 | 174/176 | 166/166 | /       | 211/225 | 327/335 | 240/262 | 221/231 |
| 4                  | N-6_204 | 163/163 | 226/234 | 174/176 | 166/166 | /       | 211/211 | 327/335 | 248/262 | 221/231 |
| 4                  | N-6_205 | 163/163 | 226/234 | 176/182 | 166/166 | /       | 211/225 | 327/335 | 248/262 | 221/221 |
| 4                  | N-6_206 | 163/193 | 230/234 | 174/176 | 166/166 | 393/393 | 199/211 | 327/335 | 240/248 | 221/221 |
| 4                  | N-6_207 | 159/163 | 230/234 | 176/182 | 166/166 | /       | 211/211 | 335/335 | 262/262 | 221/221 |
| 4                  | N-6_208 | 159/193 | 226/234 | 174/176 | 166/166 | /       | 199/225 | 327/335 | 262/262 | 221/231 |
| 4                  | N-6_209 | 159/193 | 226/234 | 174/176 | 166/166 | /       | 199/225 | 327/335 | 248/262 | 221/221 |
| 4                  | N-6_210 | 159/193 | 226/234 | 174/176 | 166/166 | /       | 199/225 | 327/335 | 248/262 | 221/231 |
| 4                  | N-6_211 | 163/163 | 226/234 | 176/182 | 166/166 | /       | 199/225 | 327/335 | 240/262 | 221/231 |
| 4                  | N-6_213 | 163/193 | 230/234 | 176/182 | 166/166 | /       | 199/225 | 327/335 | 240/262 | 221/221 |
| 4                  | N-6_214 | 159/163 | 230/234 | 176/182 | 166/166 | 393/393 | 199/211 | 327/335 | 248/262 | 221/231 |
| 4                  | N-6_215 | 163/193 | 226/234 | 176/182 | 166/166 | /       | 199/225 | 335/335 | 240/262 | 221/221 |
| 4                  | N-6_216 | 159/193 | 230/234 | 174/176 | 166/166 | /       | 199/211 | 327/335 | 262/262 | 221/231 |
|                    |         |         |         |         |         |         |         |         |         |         |
| Most likely female | C22051  | 159/163 | 234/234 | 176/176 | 166/166 | 387/393 | 211/225 | 327/335 | 240/262 | 221/231 |



| Group | ID      | Cj16    | Cj18    | Cj20    | Cj35    | Cj109   | Cj119   | Cj127   | Cj131   | CU5-123 |
|-------|---------|---------|---------|---------|---------|---------|---------|---------|---------|---------|
| 1     | N-9_143 | 159/175 | 234/234 | 174/174 | 166/166 | 393/393 | 225/225 | 327/335 | 240/262 | 221/223 |
| 1     | N-9_160 | 159/175 | 234/234 | 174/182 | 166/166 | 393/393 | 225/225 | 327/335 | 240/258 | 221/221 |
| 2     | N-9_144 | 159/159 | 234/234 | 174/182 | 166/166 | 387/393 | 225/225 | 327/335 | 258/262 | 221/223 |
| 2     | N-9_152 | 159/175 | 234/234 | 174/182 | 166/166 | 393/393 | 225/225 | 333/335 | 258/262 | 221/223 |
| 2     | N-9_165 | 159/175 | 234/234 | 174/174 | 166/166 | 387/393 | 225/225 | 335/335 | 258/262 | 221/221 |
| 3     | N-9_136 | 159/175 | 234/234 | 174/174 | 166/166 | 393/393 | 211/211 | 335/335 | 258/262 | 221/223 |
| 3     | N-9_139 | 159/159 | 234/234 | 174/174 | 166/166 | 393/393 | 211/227 | 335/335 | 240/258 | 221/221 |
| 3     | N-9_140 | 159/175 | 234/234 | 174/174 | 166/166 | 387/393 | 211/227 | 335/335 | 258/262 | 223/223 |
| 3     | N-9_141 | 159/175 | 234/234 | 174/182 | 166/166 | 387/393 | 211/211 | 327/335 | 240/258 | 221/221 |
| 3     | N-9_145 | 159/175 | 234/234 | 174/182 | 166/166 | 387/393 | 211/211 | 335/335 | 240/258 | 221/221 |
| 3     | N-9_146 | 159/159 | 234/234 | 182/182 | 166/166 | 393/393 | 211/227 | 327/327 | 240/240 | 221/223 |
| 3     | N-9_148 | 159/175 | 234/234 | 174/182 | 166/166 | 393/393 | 211/225 | 327/335 | 258/262 | 221/221 |
| 3     | N-9_149 | 159/175 | 234/234 | 174/182 | 166/166 | 387/393 | 211/227 | 327/335 | 240/262 | 221/221 |
| 3     | N-9_150 | 159/175 | 234/234 | 182/182 | 166/166 | 387/393 | 211/227 | 327/335 | 240/258 | 223/223 |
| 3     | N-9_151 | 159/159 | 234/234 | 174/182 | 166/166 | 393/393 | 211/227 | 327/335 | 240/258 | 221/221 |
| 3     | N-9_153 | 159/159 | 234/234 | 174/182 | 166/166 | 393/393 | 211/211 | 327/327 | 240/240 | 221/223 |
| 3     | N-9_156 | 159/175 | 234/234 | 174/182 | 166/166 | 387/393 | 211/225 | 327/335 | 240/240 | 221/223 |
| 3     | N-9_157 | 159/175 | 234/234 | 182/182 | 166/166 | 387/393 | 211/225 | 335/335 | 258/262 | 221/221 |
| 3     | N-9_158 | 159/175 | 234/234 | 174/174 | 166/166 | 387/393 | 211/211 | 335/335 | 240/258 | 221/221 |
| 3     | N-9_161 | 159/159 | 234/234 | 182/182 | 166/166 | 387/393 | 211/227 | 327/327 | 240/262 | 223/223 |
| 3     | N-9_162 | 159/175 | 234/234 | 174/182 | 166/166 | 393/393 | 211/225 | 335/335 | 258/262 | 221/221 |
| 3     | N-9_163 | 159/175 | 234/234 | 182/182 | 166/166 | 393/393 | 211/211 | 327/335 | 240/258 | 221/223 |
| 3     | N-9_167 | 159/159 | 234/234 | 174/182 | 166/166 | 387/393 | 211/227 | 335/335 | 258/262 | 221/221 |
| 3     | N-9_170 | 159/175 | 234/234 | 174/182 | 166/166 | /       | 211/227 | 327/327 | 240/240 | 221/221 |
| 3     | N-9_171 | 159/175 | 234/234 | 174/174 | 166/166 | 387/393 | 211/211 | 327/335 | 240/240 | 221/223 |
| 3     | N-9_172 | 159/175 | 234/234 | 174/182 | 166/166 | 393/393 | 211/211 | 327/335 | 240/258 | 221/221 |
| 3     | N-9_173 | 159/159 | 234/234 | 174/182 | 166/166 | 387/393 | 211/225 | 335/335 | 258/262 | 221/221 |

|                    |         |         |         |         |         |         |         |         |         |         |         |
|--------------------|---------|---------|---------|---------|---------|---------|---------|---------|---------|---------|---------|
| 3                  | N-9_174 | 159/159 | 234/234 | 174/182 | 166/166 | 387/393 | 211/211 | 327/335 | 240/262 | 221/221 |         |
| 3                  | N-9_175 | 159/159 | 234/234 | 174/182 | 166/166 | 393/393 | 211/225 | 327/327 | 240/240 | 223/223 |         |
| 4                  | N-9_169 | 159/175 | 234/234 | 182/182 | 166/166 | 387/393 | 225/225 | 327/327 | 240/240 | 223/223 |         |
| 4                  | N-9_S-N | 159/159 | 234/234 | 182/182 | 166/166 | 387/393 | 225/225 | 327/327 | 240/240 | 223/223 |         |
| Most likely female |         | C22023  | 163/163 | 224/232 | 174/174 | 0/0     | 393/393 | 209/225 | 327/335 | 258/262 | 223/223 |

| Group              | ID       | Cj16    | Cj18    | Cj20    | Cj35    | Cj109   | Cj119   | Cj127   | Cj131   | CU5-123 |
|--------------------|----------|---------|---------|---------|---------|---------|---------|---------|---------|---------|
| 1                  | N-14_665 | 159/175 | 230/230 | 176/182 | 166/166 | 419/419 | 211/211 | 335/335 | 248/262 | 221/231 |
| 2                  | N-14_667 | 159/179 | 234/234 | 182/182 | 166/166 | 387/387 | 211/227 | 335/335 | 248/262 | 223/231 |
| 3                  | N-14_659 | 159/175 | 230/234 | 182/182 | 166/166 | 387/393 | 211/211 | 335/335 | 248/262 | 223/231 |
| 3                  | N-14_660 | 159/175 | 234/234 | 182/182 | 166/166 | 387/393 | 211/211 | 335/335 | 248/262 | 221/231 |
| 3                  | N-14_661 | 159/175 | 230/234 | 182/182 | 166/166 | 387/393 | 211/211 | 335/335 | 248/262 | 221/231 |
| 3                  | N-14_664 | 159/179 | 230/230 | 176/182 | 166/166 | 387/393 | 211/227 | 335/335 | 248/262 | 223/231 |
| 3                  | N-14_668 | 159/175 | 234/234 | 182/182 | 166/166 | 385/419 | 211/227 | 335/335 | 248/262 | 221/231 |
| 3                  | N-14_669 | 159/175 | 234/234 | 182/182 | 166/166 | 387/393 | 211/211 | 335/335 | 248/262 | 221/231 |
| 3                  | N-14_670 | 163/179 | 230/230 | 174/182 | 166/166 | 387/393 | 221/227 | 335/335 | 262/262 | 223/231 |
| 3                  | N-14_672 | 159/175 | 234/234 | 176/182 | 166/166 | 387/393 | 211/211 | 327/335 | 240/262 | 221/231 |
| 4                  | N-14_662 | 159/179 | 230/234 | 176/182 | 166/166 | 387/387 | 211/211 | 335/335 | 248/262 | 221/231 |
| 4                  | N-14_666 | 159/175 | 230/234 | 176/182 | 166/166 | 393/393 | 211/227 | 335/335 | 248/262 | 221/231 |
| 4                  | N-14_671 | 159/175 | 230/234 | 176/182 | 166/166 | 387/387 | 211/211 | 335/335 | 248/262 | 223/231 |
| 4                  | N-14_673 | 159/175 | 234/234 | 176/182 | 166/166 | 387/387 | 211/227 | 335/335 | 248/262 | 221/231 |
| 4                  | N-14_675 | 159/179 | 230/234 | 176/182 | 166/166 | 387/387 | 211/211 | 335/335 | 248/262 | 221/231 |
| 5                  | N-14_676 | 159/179 | 230/234 | 182/182 | 166/166 | 381/419 | 211/211 | 335/335 | 248/262 | 221/231 |
| 6                  | N-14_663 | 159/179 | 230/230 | 176/182 | 166/166 | 393/393 | 211/211 | 327/335 | 240/262 | 223/231 |
| 6                  | N-14_677 | 159/175 | 234/234 | 176/182 | 166/166 | 393/393 | 211/211 | 327/335 | 240/262 | 223/231 |
| Most likely female | C22084   | 159/159 | 230/234 | 174/182 | 166/166 | 387/393 | 211/211 | 327/335 | 240/258 | 221/221 |

| Group                     | ID       | Cj16    | Cj18    | Cj20    | Cj35    | Cj109   | Cj119   | Cj127   | Cj131   | CU5-123 |
|---------------------------|----------|---------|---------|---------|---------|---------|---------|---------|---------|---------|
| 1                         | N-33_396 | 175/175 | 230/234 | 174/174 | 166/166 | 387/393 | 227/227 | 327/335 | 258/258 | 221/231 |
| 1                         | N-33_401 | 175/175 | 230/234 | 174/182 | 166/166 | 387/393 | 227/227 | 327/335 | 258/258 | 231/231 |
| 2                         | N-33_406 | 151/175 | 224/234 | 174/176 | 166/166 | 387/393 | 221/225 | 335/335 | 258/262 | 221/231 |
| 3                         | N-33_414 | 175/175 | 234/234 | 174/182 | 166/166 | 387/387 | 225/225 | 327/327 | 258/258 | 223/231 |
| 4                         | N-33_409 | 159/175 | 230/234 | 174/182 | 166/166 | 387/393 | 227/227 | 327/327 | 240/262 | 231/231 |
| 4                         | N-33_413 | 159/175 | 230/234 | 174/182 | 166/166 | 387/393 | 227/227 | 327/335 | 258/262 | 231/231 |
| 4                         | N-33_416 | 175/175 | 234/234 | 174/182 | 166/166 | 387/393 | 227/227 | 327/327 | 240/258 | 231/231 |
| 5                         | N-33_388 | 159/175 | 234/234 | 182/182 | 166/166 | 387/393 | 211/225 | 327/335 | 258/258 | 231/231 |
| 5                         | N-33_389 | 175/175 | 230/234 | 174/174 | 166/166 | 387/393 | 225/225 | 327/335 | 258/258 | 229/231 |
| 5                         | N-33_391 | 175/175 | 230/234 | 174/174 | 166/166 | 387/393 | 211/225 | 335/335 | 258/258 | 231/231 |
| 5                         | N-33_392 | 159/175 | 234/234 | 174/174 | 166/166 | 387/393 | 211/227 | 327/335 | 240/262 | 221/231 |
| 5                         | N-33_394 | 159/175 | 230/234 | 174/182 | 166/166 | 387/393 | 211/227 | 327/327 | 240/258 | 231/231 |
| 5                         | N-33_395 | 159/175 | 230/234 | 174/174 | 166/166 | 387/393 | 211/227 | /       | 258/262 | 229/231 |
| 5                         | N-33_399 | 159/175 | 230/234 | 174/174 | 166/166 | 387/387 | 211/225 | 327/335 | 240/262 | 221/231 |
| 5                         | N-33_400 | 159/175 | 234/234 | 174/182 | 166/166 | 387/393 | 211/225 | 335/335 | 258/262 | 221/231 |
| 5                         | N-33_402 | 159/175 | 234/234 | 174/182 | 166/166 | 387/393 | 211/225 | 335/335 | 258/258 | 221/231 |
| 5                         | N-33_405 | 175/175 | 234/234 | 182/182 | 166/166 | 387/393 | 225/225 | 327/335 | 258/258 | 231/231 |
| 5                         | N-33_408 | 159/175 | 230/234 | 182/182 | 166/166 | 387/393 | 211/225 | 327/335 | 258/258 | 221/231 |
| 5                         | N-33_410 | 175/175 | 230/234 | 174/182 | 166/166 | 387/393 | 211/227 | 327/335 | 258/258 | 231/231 |
| 5                         | N-33_411 | 159/175 | 234/234 | 174/182 | 166/166 | 387/393 | 211/227 | 335/335 | 258/258 | 221/231 |
| 5                         | N-33_412 | 175/175 | 230/234 | 174/174 | 166/166 | 387/393 | 225/225 | 327/335 | 240/258 | 231/231 |
| 5                         | N-33_417 | 175/175 | 234/234 | 174/182 | 166/166 | 387/393 | 211/227 | 335/335 | 258/262 | 221/231 |
| 5                         | N-33_418 | 159/175 | 230/234 | 174/182 | 166/166 | 387/393 | 225/225 | 335/335 | 258/262 | 231/231 |
| <b>Most likely female</b> | C22071B  | 175/175 | 230/234 | 174/182 | 166/166 | 387/387 | 225/225 | 327/335 | 258/262 | 231/231 |

| Group                     | ID       | Cj16    | Cj18    | Cj20    | Cj35    | Cj109   | Cj119   | Cj127   | Cj131   | CU5-123 |
|---------------------------|----------|---------|---------|---------|---------|---------|---------|---------|---------|---------|
| 1                         | N-58_739 | 163/179 | 230/232 | 174/176 | 166/166 | 393/393 | 211/211 | 335/335 | 262/262 | 221/221 |
| 2                         | N-58_741 | 163/175 | 224/234 | 174/176 | 166/166 | 387/393 | 211/221 | 335/335 | 258/258 | 221/231 |
| 3                         | N-58_743 | 163/179 | 224/234 | 174/176 | 166/166 | 387/393 | 211/211 | 335/335 | 258/262 | 221/225 |
| 4                         | N-58_734 | 163/163 | 234/234 | 174/176 | 166/184 | 387/393 | 211/211 | 327/335 | 258/258 | 221/221 |
| 4                         | N-58_735 | 163/163 | 234/234 | 174/176 | 166/184 | 387/393 | 211/211 | 335/373 | 232/262 | 225/231 |
| 4                         | N-58_736 | 163/163 | 234/234 | 174/176 | 166/184 | 387/393 | 227/227 | 335/373 | 232/262 | 221/221 |
| 4                         | N-58_737 | 163/163 | 232/234 | 174/176 | 166/184 | 387/393 | 211/211 | 335/373 | 232/262 | 221/225 |
| 4                         | N-58_738 | 163/179 | 234/234 | 174/176 | 166/166 | 393/393 | 211/211 | 335/373 | 232/258 | 221/221 |
| 4                         | N-58_740 | 163/179 | 230/232 | 174/176 | 166/166 | 393/393 | 211/211 | 335/335 | 258/262 | 221/221 |
| 4                         | N-58_742 | 163/163 | 232/234 | 174/176 | 166/166 | 393/419 | 227/227 | 327/335 | 258/262 | 225/231 |
| 4                         | N-58_744 | 163/179 | 234/234 | 174/176 | 166/166 | 393/393 | 211/211 | 335/373 | 232/258 | 221/221 |
| <b>Most likely female</b> | C22005   | 159/163 | 230/234 | 174/182 | 166/166 | 387/393 | 209/225 | 327/335 | 240/240 | 231/251 |

**Table S2.** The best configuration from the sibship reconstructions indicating the assigned mother and fathers and the probabilities of those assignments for each *C. rhombifer* nest. The number of hatchlings per nest associated with each father is also indicated.

|         | Mother<br>(probability) | Fathers<br>(# of offspring, mean probability) |                    |                     |                    |               |               |
|---------|-------------------------|-----------------------------------------------|--------------------|---------------------|--------------------|---------------|---------------|
| Nest 6  | C22051<br>(1.00)        | C22101<br>(15, 0.97)                          | male 1<br>(1)      | male 2<br>(1)       | male 3<br>(1)      | male 4<br>(1) |               |
| Nest 9  | female 1                | male 5<br>(24)                                | male 6<br>(3)      | male 7<br>(3)       | CB041<br>(1, 0.66) |               |               |
| Nest 14 | female 2                | C22056<br>(13, 0.96)                          | male 8<br>(4)      | C22014<br>(1, 0.40) |                    |               |               |
| Nest 33 | C22071B<br>(0.60)       | C22007<br>(15, 0.75)                          | male 9<br>(3)      | male 2<br>(1)       | male 5<br>(1)      | male 6<br>(1) | male 7<br>(1) |
| Nest 58 | female 3                | male 3<br>(5)                                 | C22102<br>(4, 1.0) | CB016<br>(1, 0.21)  | male 10<br>(1)     |               |               |
